# Supplementary material for: Donor Financing of Global Mental Health, 1995—2015: An Assessment of Trends, Channels, and Alignment with the Disease Burden
Source: PLOS journal article supplement (doi:10.1371/journal.pone.0169384), 2017-01-03
Supplement: S3 (10.1371/journal.pone.0169384.s003) [file journal.pone.0169384.s003]

S2 Fig: DAMH disbursement by channel, 2015

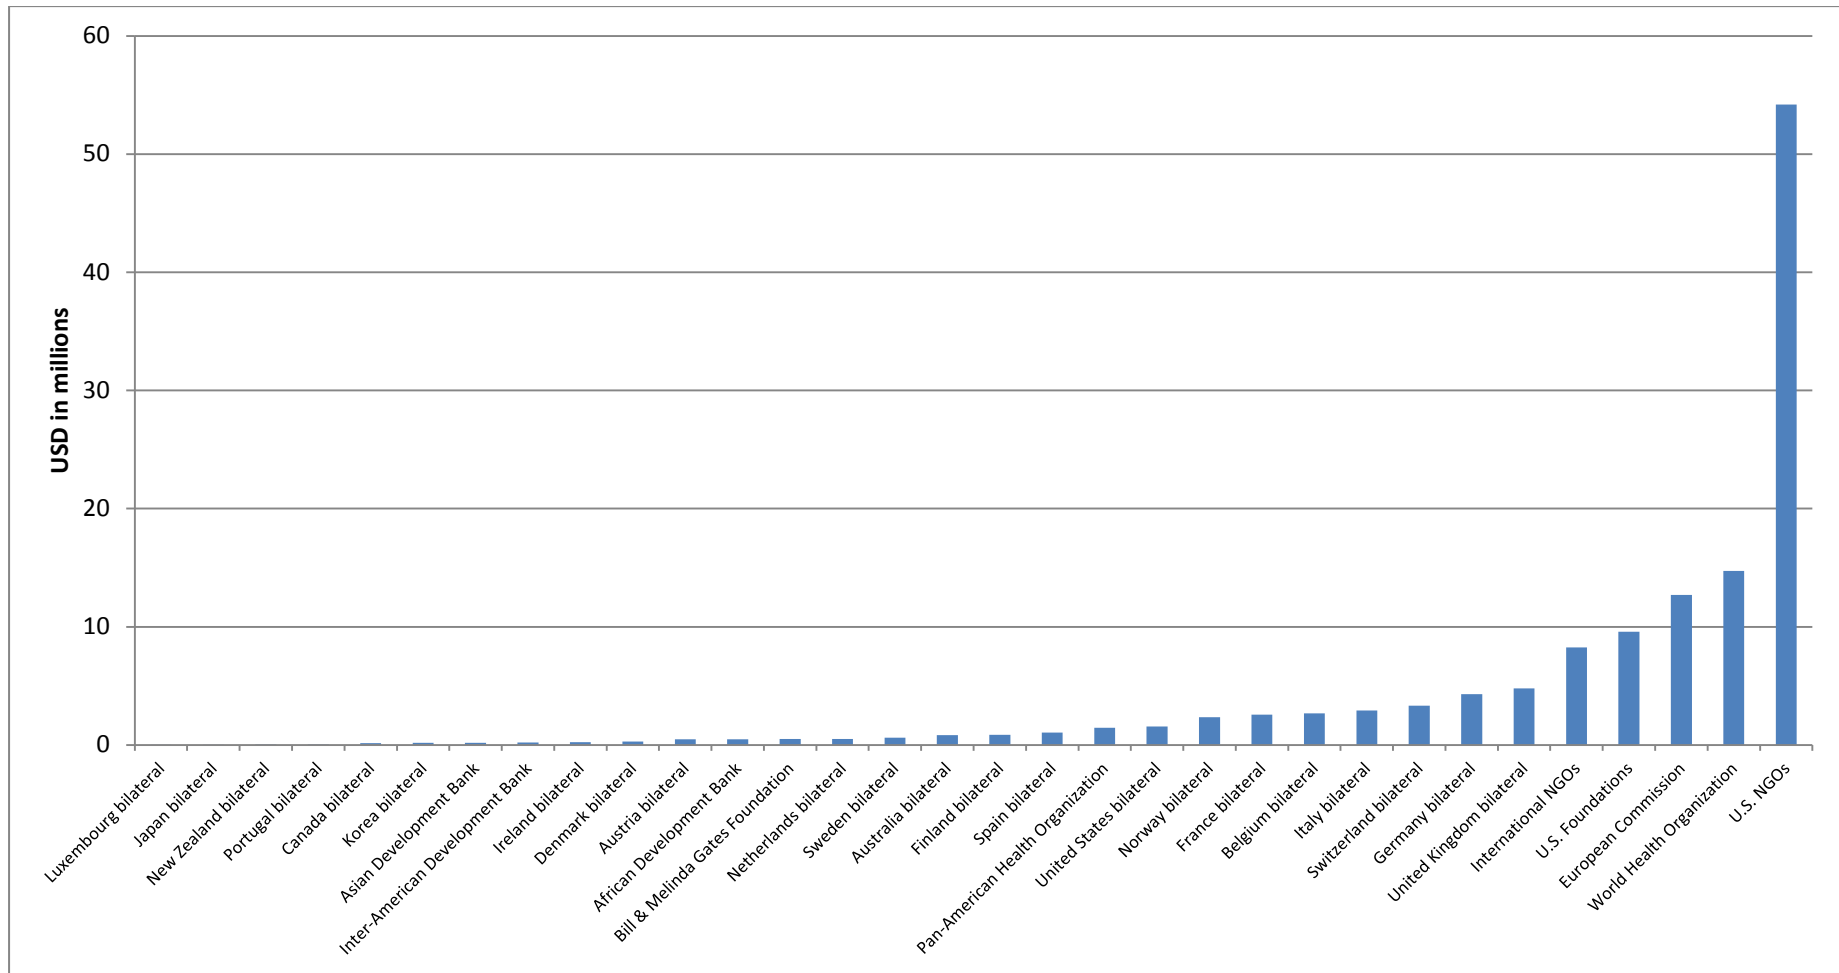

Note: Data is averaged across a 3-year period, 2014-2016.
